# Supplementary material for: Electrochromic tetrathiafulvalene derivatives functionalised with 2,5-diaryl-1,3,4-oxadiazole chromophoresElectronic Supplementary Information (ESI) available: spectroelectrochemistry of 3 and 4; 1H-NMR spectra and cyclic voltammograms for 3, 4 and 5; crystallographic information for 5. See http://www.rsc.org/suppdata/cc/b3/b316243p/
Source: Royal Society of Chemistry journal article supplement (doi:10.1039/b316243p), 2004-01-01
Supplement: b316243p.pdf [file b316243p.pdf]

## Supplementary Information For:

## Electrochromic tetrathiafulvalene derivatives functionalised with 2,5-diaryl-1,3,4-oxadiazole chromophores

Changsheng Wang, Andrei S. Batsanov and Martin R. Bryce\*

*Department of Chemistry, University of Durham, Durham DH1 3LE, UK. Fax: +44-191-3844737; Tel: 44-191-3342018; E-mail: m.r.bryce@durham.ac.uk*

1. Absorption spectroelectrochemistry of **3**. Measured under the conditions in the caption to Fig 2.

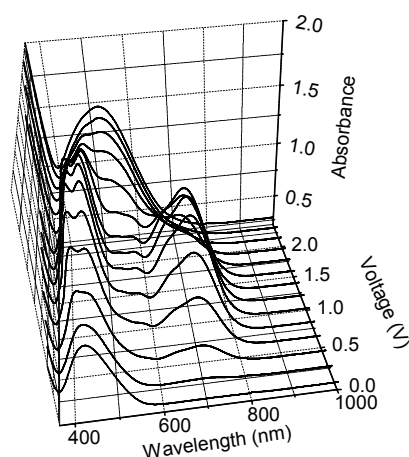

2. Absorption spectroelectrochemistry of **4**. Measured under the conditions in the caption to Fig 2.

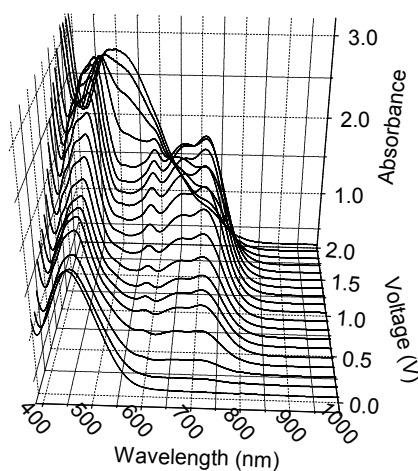

3. <sup>1</sup>H NMR of compound **3**, measured in CDCl<sub>3</sub> treated with NaOH.

Bruker data converted from file  
/data/data/wakeup/nmr/12102133/10  
CSW-399  
NaOH added  
Pulse Sequence: zg30  
Solvent: cdcl3  
Temp. 24.2 C / 297.3 K  
File: 10.cv  
Processed on "korn"  
Relax. delay 1.000 sec  
1st pulse 30.0 degrees  
2nd pulse 90.0 degrees  
Acq. time 7.889 sec  
Width 8275.1 Hz  
16 repetitions  
OBSERVE OFF, 400.1300131 MHz  
DATA PROCESSING  
FT size 65536

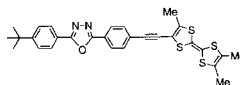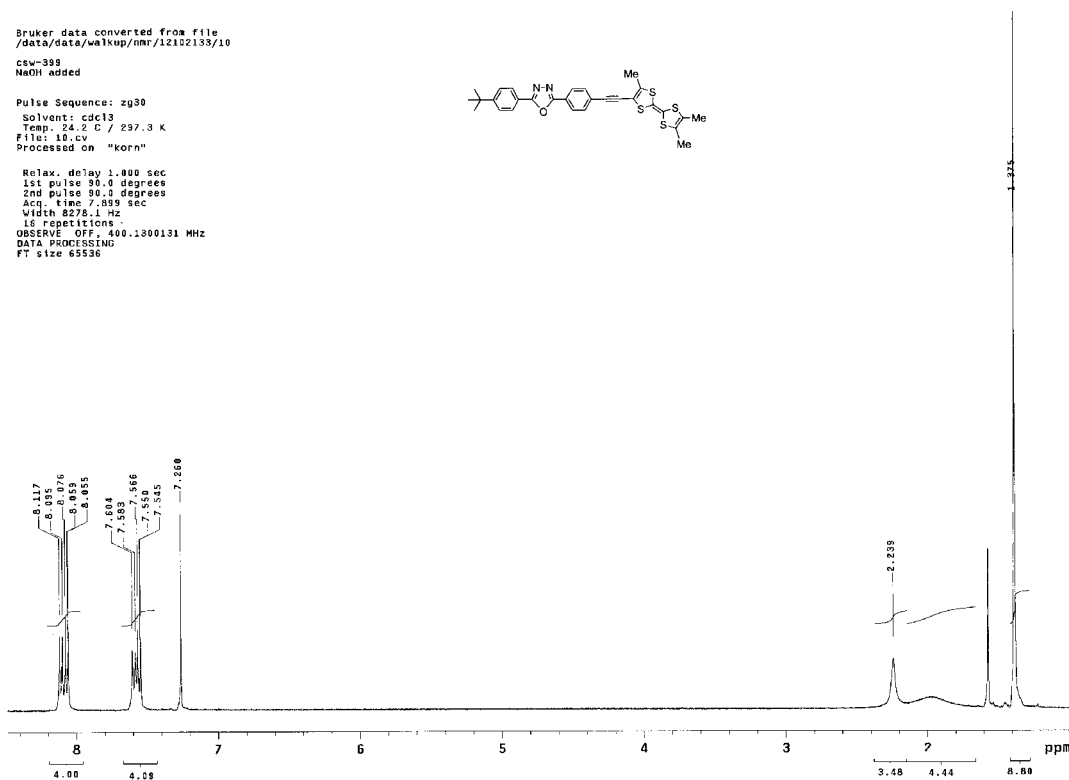

4. <sup>1</sup>H NMR of compound **4**, measured in CDCl<sub>3</sub> treated with NaOH.

CSW -410  
Pulse Sequence: s2pu1  
Solvent: CDCl3  
Ambient temperature  
File: /data/c03011/12165195-01  
Processed on "korn"  
Pulse 45.0 degrees  
Acq. time 4.980 sec  
Width 7997.6 Hz  
32 repetitions  
OBSERVE ON, 499.8658214 MHz  
DATA PROCESSING  
FT size 85536

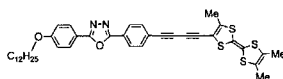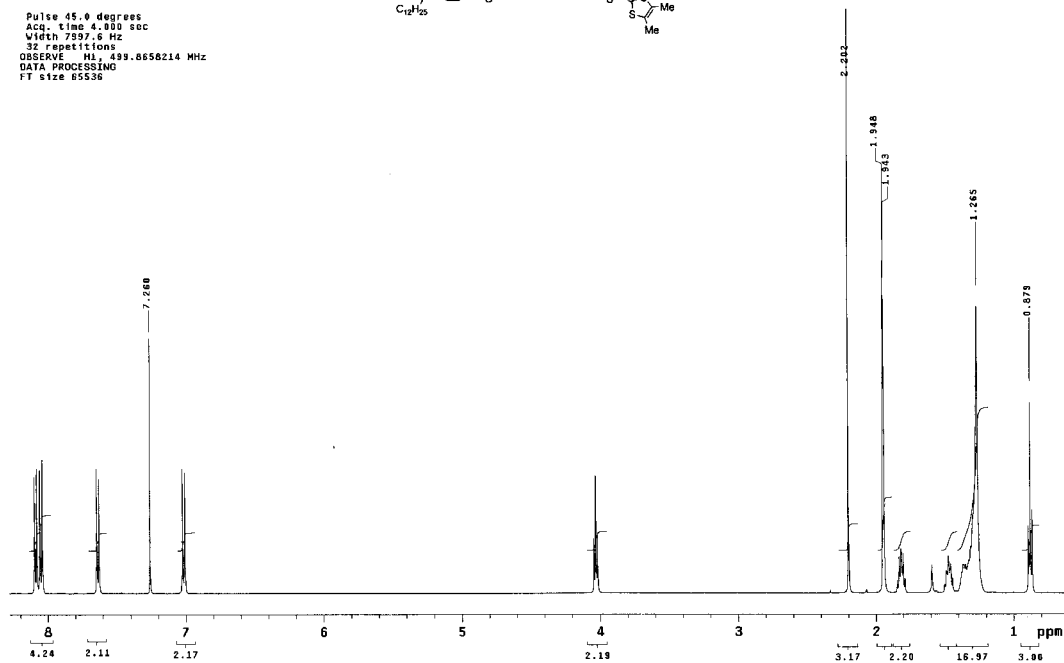

5. <sup>1</sup>H NMR of compound 5.

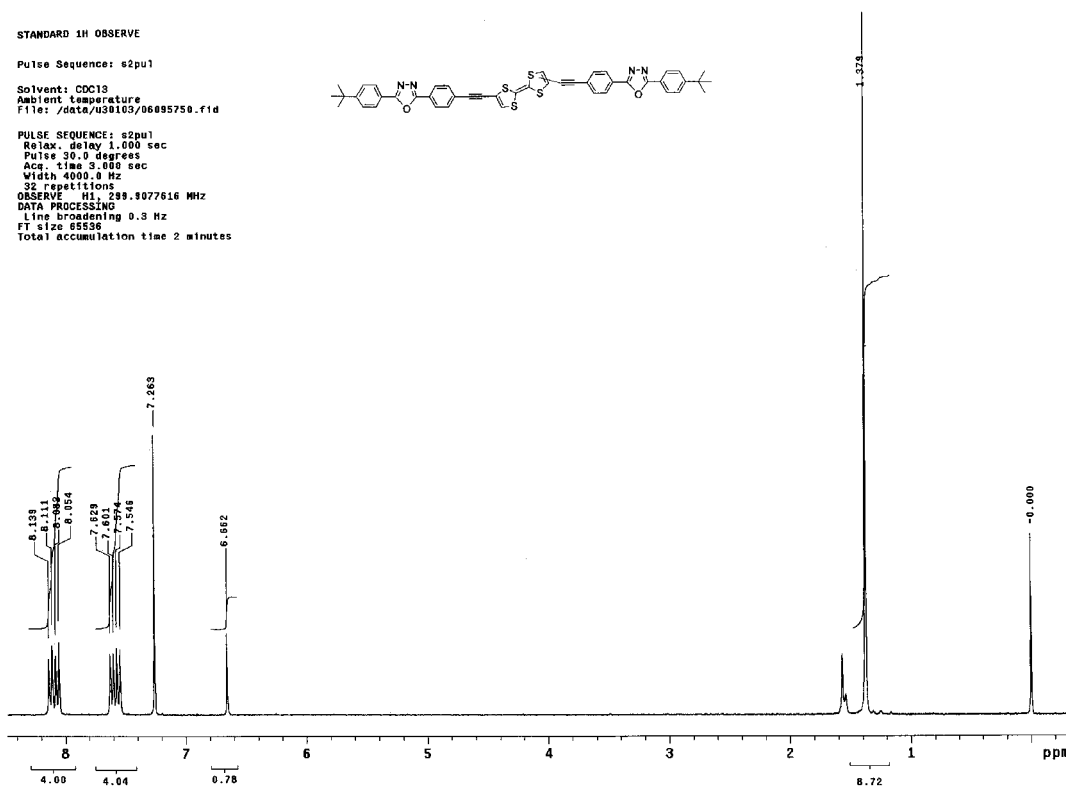

6. Cyclic voltammograms of compounds 3-5. Supporting electrolyte: 0.1 M TBAPF<sub>6</sub> in DCM. Electrodes: working; Pt disk ( $\Phi = 1.8$  mm); counter, Pt wire; reference, Ag/AgNO<sub>3</sub> in acetonitrile. Scan rate: 100 mV/sec.

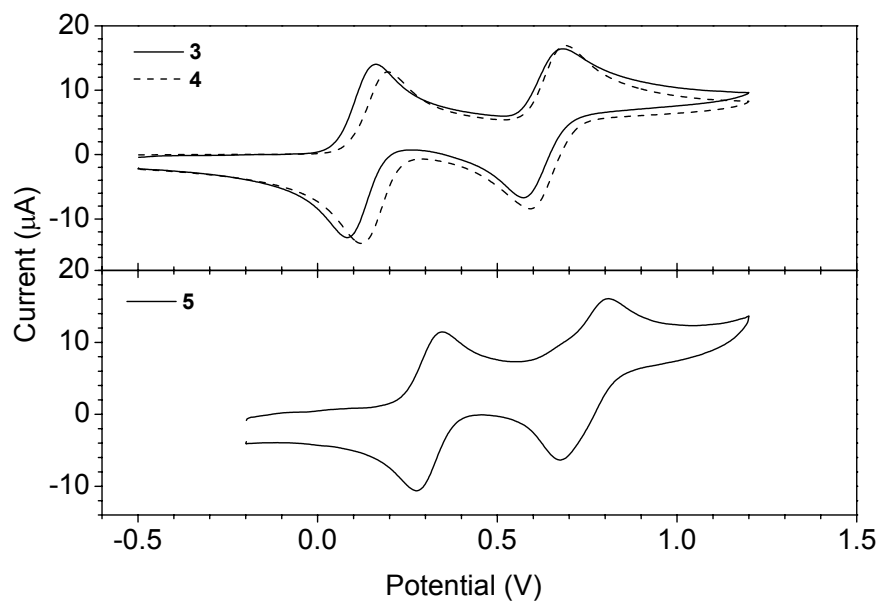

## 7. Further crystallographic information for compound **5**.

The structure was solved by direct methods and refined by full-matrix least squares against  $F^2$  of all reflections, using SHELX-97 software (G. M. Sheldrick, Göttingen University, 1997).

Figure 1 was plotted at 50% displacement ellipsoids. One *t*-Bu group is disordered between two orientations with occupancies 60% (solid) and 40% (dashed, H atoms omitted), the likely disorder of the other *t*-Bu was not resolved. Molecule **5** has no crystallographic symmetry, and the conformations of its two halves are rather dissimilar. The TTF moiety adopts an asymmetric boat conformation, folding along the S(1)⋯S(2) and S(3)⋯S(4) vectors by 11.6 and 5.3°, the outer S<sub>2</sub>C<sub>2</sub> fragments *i* and *ii* are planar. The C(7)≡C(8) bond is tilted out of plane *i* by 10.2°, while the C(27)≡C(28) bond by only 1.5° from plane *ii*. The dihedral angles involving benzene (*iii*, *v*, *vi*, *viii*) and oxadiazole (*iv*, *vii*) rings are: *i/iii* 17.3, *iii/iv* 14.3, *iv/v* 20.0, *ii/vi* 38.5, *vi/vii* 21.7, *vii/viii* 16.2°. Nevertheless, the deviation of *all* non-hydrogen atoms (except methyl carbons) from their mean plane (average 0.19 Å, maximum 0.64 Å) is small compared to the overall length of the molecule (*ca.* 43 Å for the van der Waals' shape).

The structure being triclinic, long axes of all the molecules in the crystal are parallel to each other. Molecules form a loose stack (parallel to the *y* axis) with a mean "interplanar" separation of *ca.* 3.6 Å, as their puckering prevents closer approach. Molecules related by the *a* translation (and belonging to adjacent stacks) are linked into infinite chains by intermolecular contacts S(1)⋯S(2') 3.57 and S(3)⋯S(4') 3.60 Å (and their equivalents), which are comparable with the standard van der Waals' contact of 3.60 Å.<sup>S1</sup>

<sup>S1</sup> R. S. Rowland and R. Taylor, *J. Phys. Chem.*, 1996, **100**, 7384.
